# Supplementary material for: preciseTAD: a transfer learning framework for 3D domain boundary prediction at base-pair resolution
Source: Oxford University Press journal article supplement (doi:10.1093/bioinformatics/btab743), 2021-11-03
Supplement: btab743_supplementary_data.zip [file btab743_supplementary_data.zip]

Archive with 2 entries (2 files):
- supplementary_v2.pdf
- supplementary_tables_and_figures.zip
